# Supplementary material
Source: MDPI journal article supplement (https://www.mdpi.com/2076-3417/13/1/521)
Supplement: s1 [file s1]

## ***Supplementary Material***

### **Content**

|                                                                                                             |   |
|-------------------------------------------------------------------------------------------------------------|---|
| Table S1. Decisive variety x and linear coded data of the Anshun Pan experiment. ....                       | 2 |
| Table S2. Experiment structural matrix of the Anshun Pan experiment. ....                                   | 2 |
| Table S3. Decisive variety x and linear coded data of the Anshun Tang experiment. ....                      | 3 |
| Table S4. Experiment structural matrix of the Anshun Tang experiment ....                                   | 3 |
| Table S5. Decisive variety x and linear coded data of the Chifeng Zheng experiment. ....                    | 4 |
| Table S6. Experiment structural matrix of the Chifeng Zheng experiment. ....                                | 5 |
| Table S7. Yield and efficiency values of various cultivation measures in the Anshun Pan experiment. ....    | 6 |
| Table S8. Yield and efficiency values of various cultivation measures in the Anshun Tang experiment. ....   | 6 |
| Table S9. Yield and efficiency values of various cultivation measures in the Chifeng Zheng experiment. .... | 7 |
| Figure S1. Output and efficiency of the Anshun Pan experiment. ....                                         | 8 |
| Figure S2. Output and efficiency of the Anshun Tang experiment. ....                                        | 8 |
| Figure S3. Output and efficiency of the Chifeng Zheng experiment. ....                                      | 9 |

**Table S1. Decisive variety  $x$  and linear coded data of the Anshun Pan experiment.**

| Variable ( $X_i$ )                      | Changes in pitch                | Design level® |        |        |        |        |
|-----------------------------------------|---------------------------------|---------------|--------|--------|--------|--------|
|                                         |                                 | -2            | -1     | 0      | 1      | 2      |
| Density ( $X_1$ )                       | 6,000 (plants/hm <sup>2</sup> ) | 42,000        | 48,000 | 54,000 | 60,000 | 66,000 |
| N ( $X_2$ )                             | 52.5 (kg/hm <sup>2</sup> )      | 69            | 121.5  | 174    | 226.5  | 279    |
| P <sub>2</sub> O <sub>5</sub> ( $X_3$ ) | 37.5 (kg/hm <sup>2</sup> )      | 75            | 112.5  | 150    | 187.5  | 225    |
| K <sub>2</sub> O ( $X_4$ )              | 45 (kg/hm <sup>2</sup> )        | 75            | 120    | 165    | 210    | 255    |

**Table S2. Experiment structural matrix of the Anshun Pan experiment.**

| Group code | $x_1$ | $x_2$ | $x_3$ | $x_4$ | Production (kg/hm <sup>2</sup> ) |
|------------|-------|-------|-------|-------|----------------------------------|
| 1          | 1     | 1     | 1     | 1     | 10,120.5                         |
| 2          | 1     | 1     | 1     | -1    | 10,480.5                         |
| 3          | 1     | 1     | -1    | 1     | 10,705.5                         |
| 4          | 1     | 1     | -1    | -1    | 10,153.5                         |
| 5          | 1     | -1    | 1     | 1     | 10,212.0                         |
| 6          | 1     | -1    | 1     | -1    | 10,315.5                         |
| 7          | 1     | -1    | -1    | 1     | 10,932.0                         |
| 8          | 1     | -1    | -1    | -1    | 9,205.5                          |
| 9          | -1    | 1     | 1     | 1     | 10,123.5                         |
| 10         | -1    | 1     | 1     | -1    | 10,051.5                         |
| 11         | -1    | 1     | -1    | 1     | 10,365.0                         |
| 12         | -1    | 1     | -1    | -1    | 10,534.5                         |
| 13         | -1    | -1    | 1     | 1     | 10,603.5                         |
| 14         | -1    | -1    | 1     | -1    | 10,095.0                         |
| 15         | -1    | -1    | -1    | 1     | 10,500.0                         |
| 16         | -1    | -1    | -1    | -1    | 8,925.0                          |
| 17         | -2    | 0     | 0     | 0     | 9,589.5                          |
| 18         | 2     | 0     | 0     | 0     | 10,407.0                         |
| 19         | 0     | -2    | 0     | 0     | 10,732.5                         |
| 20         | 0     | 2     | 0     | 0     | 10,015.5                         |
| 21         | 0     | 0     | -2    | 0     | 9,606.0                          |

|    |   |   |   |    |          |
|----|---|---|---|----|----------|
| 22 | 0 | 0 | 2 | 0  | 10,233.0 |
| 23 | 0 | 0 | 0 | -2 | 10,237.5 |
| 24 | 0 | 0 | 0 | 2  | 10,017.0 |
| 25 | 0 | 0 | 0 | 0  | 10,228.5 |
| 26 | 0 | 0 | 0 | 0  | 11,020.5 |
| 27 | 0 | 0 | 0 | 0  | 11,112.0 |
| 28 | 0 | 0 | 0 | 0  | 11,421.0 |
| 29 | 0 | 0 | 0 | 0  | 11,365.5 |
| 30 | 0 | 0 | 0 | 0  | 11,248.5 |
| 31 | 0 | 0 | 0 | 0  | 10,905.0 |
| 32 | 0 | 0 | 0 | 0  | 11,167.5 |
| 33 | 0 | 0 | 0 | 0  | 11,269.5 |
| 34 | 0 | 0 | 0 | 0  | 11,227.5 |
| 35 | 0 | 0 | 0 | 0  | 11,943.0 |
| 36 | 0 | 0 | 0 | 0  | 11,905.5 |

**Table S3. Decisive variety  $x$  and linear coded data of the Anshun Tang experiment.**

| Variable ( $X_i$ )                      | Changes in pitch                 | Design level® |        |        |        |        |
|-----------------------------------------|----------------------------------|---------------|--------|--------|--------|--------|
|                                         |                                  | -2            | -1     | 0      | 1      | 2      |
| Density ( $X_1$ )                       | 5,340 (plants /hm <sup>2</sup> ) | 53,355        | 58,695 | 64,035 | 69,360 | 74,700 |
| N ( $X_2$ )                             | 180 (kg/hm <sup>2</sup> )        | 0             | 180    | 360    | 540    | 720    |
| P <sub>2</sub> O <sub>5</sub> ( $X_3$ ) | 120 (kg/hm <sup>2</sup> )        | 0             | 120    | 240    | 360    | 480    |
| K <sub>2</sub> O ( $X_4$ )              | 120 (kg/hm <sup>2</sup> )        | 0             | 120    | 240    | 360    | 480    |

**Table S4. Experiment structural matrix of the Anshun Tang experiment**

| Group code | $x_1$ | $x_2$ | $x_3$ | $x_4$ | Production (kg/hm <sup>2</sup> ) |
|------------|-------|-------|-------|-------|----------------------------------|
| 1          | 1     | 1     | 1     | 1     | 11,288.40                        |
| 2          | 1     | 1     | 1     | -1    | 11,719.35                        |
| 3          | 1     | 1     | -1    | 1     | 11,993.55                        |
| 4          | 1     | 1     | -1    | -1    | 10,898.40                        |
| 5          | 1     | -1    | 1     | 1     | 11,843.25                        |

|    |    |    |    |    |           |
|----|----|----|----|----|-----------|
| 6  | 1  | -1 | 1  | -1 | 11,517.00 |
| 7  | 1  | -1 | -1 | 1  | 12,269.40 |
| 8  | 1  | -1 | -1 | -1 | 10,163.85 |
| 9  | -1 | 1  | 1  | 1  | 11,284.05 |
| 10 | -1 | 1  | 1  | -1 | 11,195.85 |
| 11 | -1 | 1  | -1 | 1  | 11,577.75 |
| 12 | -1 | 1  | -1 | -1 | 11,785.05 |
| 13 | -1 | -1 | 1  | 1  | 11,868.60 |
| 14 | -1 | -1 | 1  | -1 | 11,247.90 |
| 15 | -1 | -1 | -1 | 1  | 12,471.60 |
| 16 | -1 | -1 | -1 | -1 | 10,885.35 |
| 17 | -2 | 0  | 0  | 0  | 11,628.30 |
| 18 | 2  | 0  | 0  | 0  | 10,631.70 |
| 19 | 0  | -2 | 0  | 0  | 12,025.50 |
| 20 | 0  | 2  | 0  | 0  | 11,152.20 |
| 21 | 0  | 0  | -2 | 0  | 10,653.00 |
| 22 | 0  | 0  | 2  | 0  | 10,812.45 |
| 23 | 0  | 0  | 0  | -2 | 11,423.10 |
| 24 | 0  | 0  | 0  | 2  | 11,152.80 |
| 25 | 0  | 0  | 0  | 0  | 13,428.00 |
| 26 | 0  | 0  | 0  | 0  | 11,721.30 |
| 27 | 0  | 0  | 0  | 0  | 12,489.45 |
| 28 | 0  | 0  | 0  | 0  | 12,864.90 |
| 29 | 0  | 0  | 0  | 0  | 12,797.25 |
| 30 | 0  | 0  | 0  | 0  | 12,655.20 |
| 31 | 0  | 0  | 0  | 0  | 12,237.00 |
| 32 | 0  | 0  | 0  | 0  | 12,555.90 |
| 33 | 0  | 0  | 0  | 0  | 12,681.60 |
| 34 | 0  | 0  | 0  | 0  | 12,630.30 |
| 35 | 0  | 0  | 0  | 0  | 13,502.10 |
| 36 | 0  | 0  | 0  | 0  | 13,456.65 |

**Table S5. Decisive variety  $x$  and linear coded data of the Chifeng Zheng experiment.**

| Variable ( $X_i$ )                      | Changes in pitch                      | Design level ® |       |      |       |      |
|-----------------------------------------|---------------------------------------|----------------|-------|------|-------|------|
|                                         |                                       | -2             | -1    | 0    | 1     | 2    |
| Density ( $X_1$ )                       | 0.75 (10,000 plants/hm <sup>2</sup> ) | 5.25           | 6     | 6.75 | 7.5   | 8.25 |
| N ( $X_2$ )                             | 75 (kg/hm <sup>2</sup> )              | 450            | 525   | 600  | 675   | 750  |
| P <sub>2</sub> O <sub>5</sub> ( $X_3$ ) | 75 (kg/hm <sup>2</sup> )              | 75             | 150   | 225  | 300   | 375  |
| K <sub>2</sub> O ( $X_4$ )              | 37.5 (kg/hm <sup>2</sup> )            | 75             | 112.5 | 150  | 187.5 | 255  |

**Table S6. Experiment structural matrix of the Chifeng Zheng experiment.**

| Group code | $x_1$ | $x_2$ | $x_3$ | $x_4$ | Production (kg/hm <sup>2</sup> ) |
|------------|-------|-------|-------|-------|----------------------------------|
| 1          | 1     | 1     | 1     | 1     | 12,696.9                         |
| 2          | 1     | 1     | 1     | -1    | 12,360                           |
| 3          | 1     | 1     | -1    | 1     | 12,691.5                         |
| 4          | 1     | 1     | -1    | -1    | 13,038                           |
| 5          | 1     | -1    | 1     | 1     | 13,128                           |
| 6          | 1     | -1    | 1     | -1    | 10,619.4                         |
| 7          | 1     | -1    | -1    | 1     | 10,121.25                        |
| 8          | 1     | -1    | -1    | -1    | 8,980.95                         |
| 9          | -1    | 1     | 1     | 1     | 1,1347.35                        |
| 10         | -1    | 1     | 1     | -1    | 12,156.75                        |
| 11         | -1    | 1     | -1    | 1     | 11,232.9                         |
| 12         | -1    | 1     | -1    | -1    | 13,891.65                        |
| 13         | -1    | -1    | 1     | 1     | 12,916.8                         |
| 14         | -1    | -1    | 1     | -1    | 13,147.05                        |
| 15         | -1    | -1    | -1    | 1     | 11,794.05                        |
| 16         | -1    | -1    | -1    | -1    | 12,329.85                        |
| 17         | 2     | 0     | 0     | 0     | 13,056.15                        |
| 18         | -2    | 0     | 0     | 0     | 12,371.4                         |

|    |   |    |    |    |           |
|----|---|----|----|----|-----------|
| 19 | 0 | 2  | 0  | 0  | 10,450.2  |
| 20 | 0 | -2 | 0  | 0  | 10,670.25 |
| 21 | 0 | 0  | 2  | 0  | 12,561.75 |
| 22 | 0 | 0  | -2 | 0  | 14,222.85 |
| 23 | 0 | 0  | 0  | 2  | 13,220.1  |
| 24 | 0 | 0  | 0  | -2 | 12,652.35 |
| 25 | 0 | 0  | 0  | 0  | 11,888.1  |
| 26 | 0 | 0  | 0  | 0  | 11,153.4  |
| 27 | 0 | 0  | 0  | 0  | 12,295.8  |
| 28 | 0 | 0  | 0  | 0  | 13,187.4  |
| 29 | 0 | 0  | 0  | 0  | 12,271.8  |
| 30 | 0 | 0  | 0  | 0  | 10,712.55 |
| 31 | 0 | 0  | 0  | 0  | 13,017.9  |

**Table S7. Yield and efficiency values of various cultivation measures in the Anshun Pan experiment. The yield data of three independent experiments were processed by min-max normalization.**

| <b>Group Code</b>               | <b>1</b>  | <b>2</b>  | <b>3</b>  | <b>4</b>  | <b>5</b>  | <b>6</b>  | <b>7</b>  | <b>8</b>  | <b>9</b>  | <b>10</b> | <b>11</b> | <b>12</b> |
|---------------------------------|-----------|-----------|-----------|-----------|-----------|-----------|-----------|-----------|-----------|-----------|-----------|-----------|
| <b>Production</b>               | 0.39      | 0.51      | 0.59      | 0.40      | 0.42      | 0.61      | 0.66      | 0.50      | 0.39      | 0.70      | 0.37      | 0.53      |
| <i>CCR efficiency value</i>     | 0.75      | 1.08      | 0.53      | 0.89      | 0.70      | 0.96      | 0.40      | 0.81      | 1.10      | 0.98      | 0.41      | 1.00      |
| <b>GDM-DEA efficiency value</b> | 0.69      | 0.50      | 0.78      | 0.30      | 0.85      | 0.40      | 0.89      | 0.30      | 0.76      | 0.50      | 0.84      | 0.70      |
| <b>Group Code</b>               | <b>13</b> | <b>14</b> | <b>15</b> | <b>16</b> | <b>17</b> | <b>18</b> | <b>19</b> | <b>20</b> | <b>21</b> | <b>22</b> | <b>23</b> | <b>24</b> |
| <b>Production</b>               | 0.55      | 0.60      | 0.38      | 0.52      | 0.20      | 0.00      | 0.22      | 0.49      | 0.10      | 0.59      | 0.36      | 0.10      |
| <i>CCR efficiency value</i>     | 1.00      | 0.01      | 1.00      | 0.01      | 1.00      | 0.00      | 0.98      | 0.31      | 1.00      | 0.00      | 0.83      | 0.31      |
| <b>GDM-DEA efficiency value</b> | 0.84      | 0.70      | 0.89      | 0.01      | 0.08      | 0.20      | 0.95      | 0.70      | 0.86      | 0.30      | 0.81      | 0.51      |
| <b>Group Code</b>               | <b>25</b> | <b>26</b> | <b>27</b> | <b>28</b> | <b>29</b> | <b>30</b> | <b>31</b> | <b>32</b> | <b>33</b> | <b>34</b> | <b>35</b> | <b>36</b> |
| <b>Production</b>               | 0.43      | 0.20      | 0.69      | 0.40      | 0.72      | 0.50      | 0.82      | 0.70      | 0.80      | 0.90      | 0.77      | 0.00      |
| <i>CCR efficiency value</i>     | 0.85      | 0.60      | 0.92      | 0.30      | 0.93      | 0.00      | 0.95      | 0.60      | 0.95      | 0.20      | 0.94      | 0.20      |
| <b>GDM-DEA efficiency value</b> | 0.85      | 0.60      | 0.92      | 0.30      | 0.93      | 0.00      | 0.95      | 0.60      | 0.95      | 0.20      | 0.94      | 0.20      |

**Table S8. Yield and efficiency values of various cultivation measures in the Anshun Tang experiment. The yield data of three independent experiments were processed by min-max normalization.**

| Group Code               | 1     | 2     | 3     | 4     | 5     | 6     | 7     | 8     | 9     | 10    | 11    | 12    |
|--------------------------|-------|-------|-------|-------|-------|-------|-------|-------|-------|-------|-------|-------|
| Production               | 0.337 | 0.466 | 0.548 | 0.220 | 0.503 | 0.405 | 0.631 | 0.000 | 0.336 | 0.309 | 0.424 | 0.486 |
| CCR efficiency value     | 0.768 | 0.865 | 0.962 | 0.925 | 0.838 | 1.000 | 0.984 | 0.934 | 0.905 | 0.950 | 0.928 | 1.000 |
| GDM-DEA efficiency value | 0.768 | 0.807 | 0.816 | 0.750 | 0.806 | 0.793 | 0.835 | 0.700 | 0.905 | 0.910 | 0.928 | 0.958 |
| Group Code               | 13    | 14    | 15    | 16    | 17    | 18    | 19    | 20    | 21    | 22    | 23    | 24    |
| Production               | 0.511 | 0.325 | 0.691 | 0.216 | 0.439 | 0.140 | 0.558 | 0.296 | 0.147 | 0.194 | 0.377 | 0.296 |
| CCR efficiency value     | 0.952 | 1.000 | 1.000 | 1.000 | 0.776 | 0.943 | 0.891 | 1.000 | 0.789 | 0.801 | 0.840 | 1.000 |
| GDM-DEA efficiency value | 0.952 | 0.914 | 1.008 | 0.884 | 0.750 | 0.943 | 0.891 | 0.826 | 0.789 | 0.801 | 0.836 | 0.836 |
| Group Code               | 25    | 26    | 27    | 28    | 29    | 30    | 31    | 32    | 33    | 34    | 35    | 36    |
| Production               | 0.978 | 0.467 | 0.697 | 0.809 | 0.789 | 0.746 | 0.621 | 0.717 | 0.754 | 0.739 | 1.000 | 0.986 |
| CCR efficiency value     | 0.995 | 0.868 | 0.925 | 0.953 | 0.948 | 0.937 | 0.906 | 0.930 | 0.939 | 0.935 | 1.000 | 0.997 |
| GDM-DEA efficiency value | 0.995 | 0.868 | 0.925 | 0.953 | 0.948 | 0.937 | 0.906 | 0.930 | 0.939 | 0.935 | 1.003 | 0.997 |

**Table S9. Yield and efficiency values of various cultivation measures in the Chifeng Zheng experiment.**

| Group Code               | 1     | 2     | 3     | 4     | 5     | 6     | 7     | 8     | 9     | 10    | 11    |
|--------------------------|-------|-------|-------|-------|-------|-------|-------|-------|-------|-------|-------|
| Production               | 0.709 | 0.645 | 0.708 | 0.774 | 0.791 | 0.313 | 0.218 | 0.000 | 0.451 | 0.606 | 0.430 |
| CCR efficiency value     | 0.744 | 0.847 | 0.788 | 0.939 | 0.959 | 0.808 | 0.813 | 0.728 | 0.726 | 0.875 | 0.809 |
| GDM-DEA efficiency value | 0.744 | 0.829 | 0.770 | 0.911 | 0.858 | 0.808 | 0.688 | 0.715 | 0.665 | 0.816 | 0.682 |
| Group Code               | 12    | 13    | 14    | 15    | 16    | 17    | 18    | 19    | 20    | 21    | 22    |
| Production               | 0.937 | 0.751 | 0.795 | 0.537 | 0.639 | 0.777 | 0.647 | 0.280 | 0.322 | 0.683 | 1.000 |
| CCR efficiency value     | 1.000 | 0.982 | 1.000 | 0.957 | 1.000 | 0.881 | 1.000 | 0.663 | 1.000 | 0.816 | 1.000 |
| GDM-DEA efficiency value | 0.970 | 0.844 | 1.027 | 0.801 | 0.982 | 0.881 | 0.835 | 0.605 | 0.817 | 0.816 | 1.199 |
| Group Code               | 23    | 24    | 25    | 26    | 27    | 28    | 29    | 30    | 31    |       |       |
| Production               | 0.809 | 0.700 | 0.555 | 0.414 | 0.632 | 0.802 | 0.628 | 0.330 | 0.770 |       |       |
| CCR efficiency value     | 0.855 | 1.000 | 0.803 | 0.753 | 0.830 | 0.890 | 0.828 | 0.723 | 0.879 |       |       |

**GDM-DEA efficiency value** 0.779 1.030 0.803 0.753 0.830 0.890 0.828 0.723 0.879

\*The yield data of three independent experiments were processed by min-max normalization.

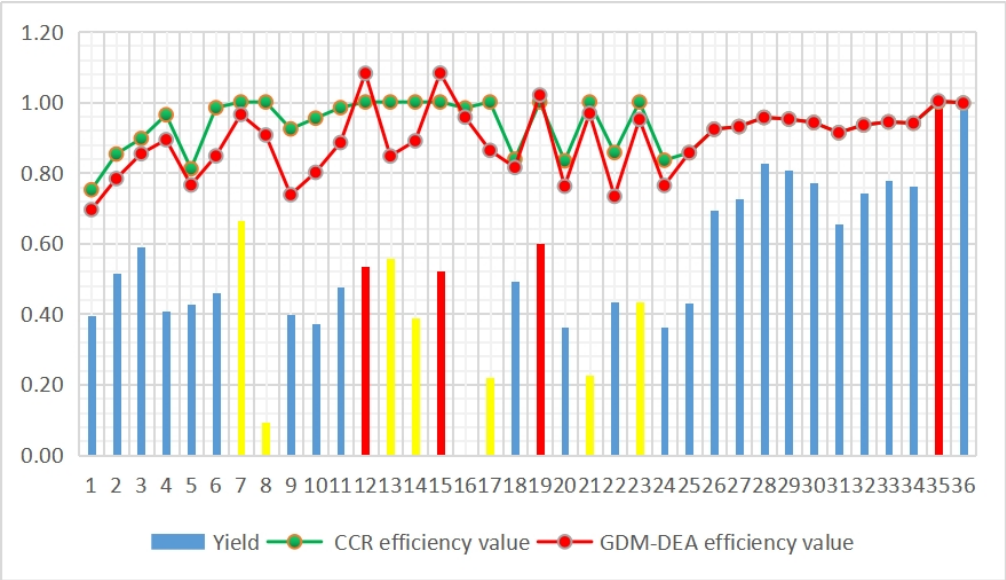

**Figure S1.** Output and efficiency of the Anshun Pan experiment. The red column bar represents the yield corresponding to the cultivation measures with *CCR* and GDM-DEA effective, while the yellow column bar represents the yield corresponding to the cultivation measures with *CCR* effective only. The green broken line indicates the efficiency trend of GDM-DEA, and each broken point represents the efficiency value of GDM-DEA. The red broken line represents the efficiency trend of *CCR*, and each broken point represents the *CCR* efficiency value.

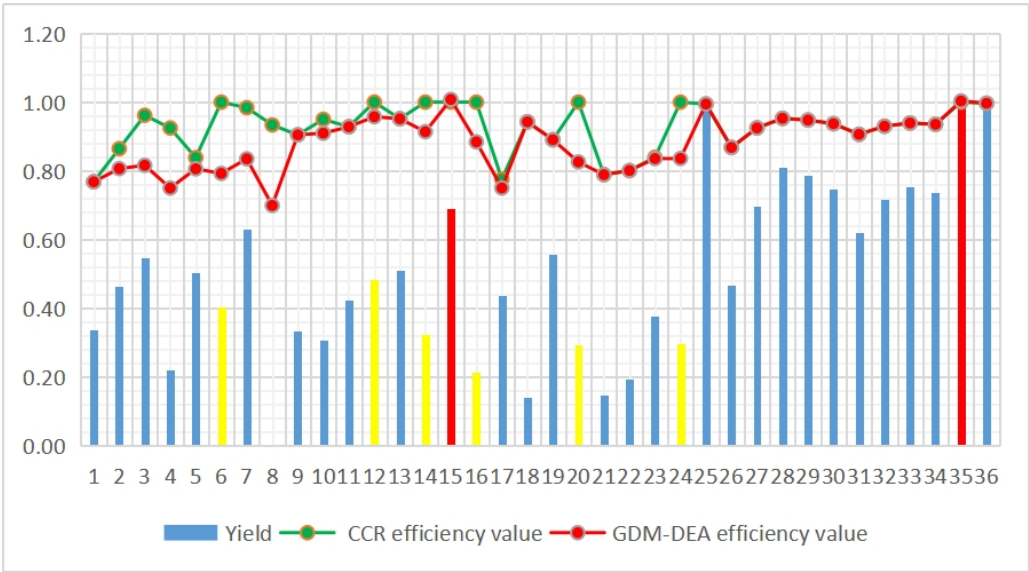

**Figure S2.** Output and efficiency of the Anshun Tang experiment. The red column bar represents the



yield corresponding to the cultivation measures with *CCR* and GDM-DEA effective, while the yellow column bar represents the yield corresponding to the cultivation measures with *CCR* effective only. The red broken line indicates the efficiency trend of GDM-DEA, and each broken point represents the efficiency value of GDM-DEA. The green broken line represents the efficiency trend of *CCR*, and each broken point represents the *CCR* efficiency value.

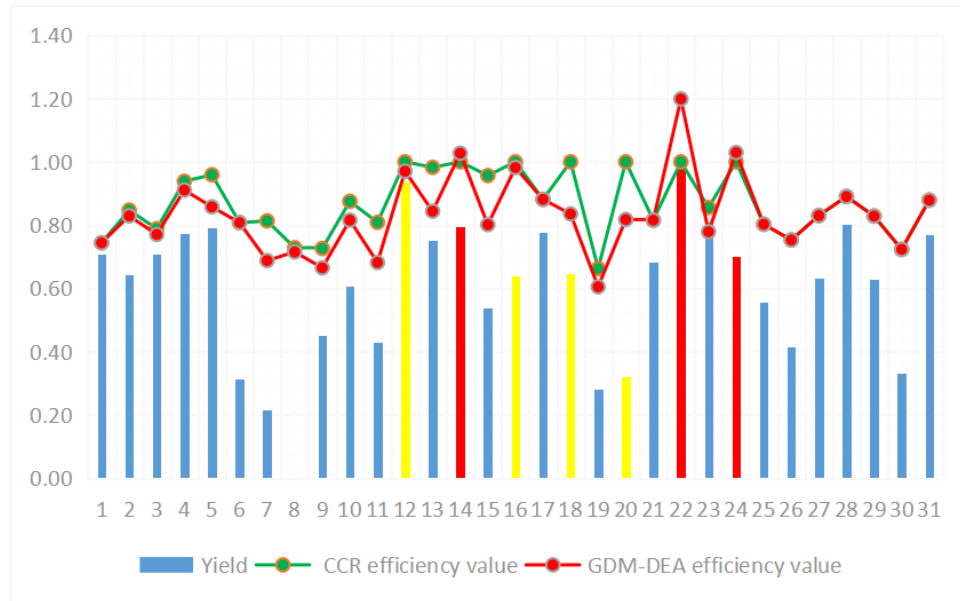

**Figure S3.** Output and efficiency of the Chifeng Zheng experiment. The red column bar represents the yield corresponding to the cultivation measures with *CCR* and GDM-DEA effective, while the yellow column bar represents the yield corresponding to the cultivation measures with *CCR* effective only. The red broken line indicates the efficiency trend of GDM-DEA, and each broken point represents the efficiency value of GDM-DEA. The green broken line represents the efficiency trend of *CCR*, and each broken point represents the *CCR* efficiency value.
